# Supplementary material
Source: publisher site journal article supplement (http://www.spandidos-publications.com/3561/downloadSupplementary)

Figure S1. Change in treatment recommendations of patients with mucinous breast carcinoma prior to and following recurrence score result. CT, chemotherapy; ET, endocrine therapy; pre, pre recurrence score; post, post recurrence score.

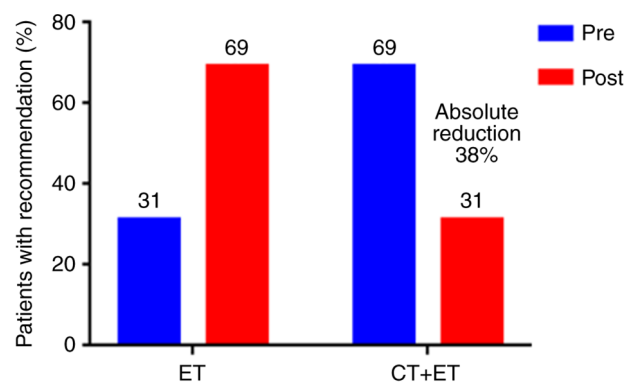

Supplement: Supplementary file 1 [file downloadSupplementary]
